# Supplementary material for: Utilization of Polymeric Micelles as a Lucrative Platform for Efficient Brain Deposition of Olanzapine as an Antischizophrenic Drug via Intranasal Delivery
Source: MDPI journal article supplement (doi:10.3390/ph15020249), 2022-02-18
Supplement: s1 [file s1]

# Utilization of Polymeric Micelles as a Lucrative Platform for Efficient Brain Deposition of Olanzapine as an Antischizophrenic Drug via Intranasal Delivery

Hadel A. Abo El-Enin <sup>1,\*</sup>, Marwa F. Ahmed <sup>2</sup>, Ibrahim A. Naguib <sup>2</sup>, Shaymaa W. El-Far <sup>3</sup>,  
Mohammed M. Ghoneim <sup>4</sup>, Izzeddin Alsalahat <sup>5</sup> and Hend Mohamed Abdel-Bar <sup>6</sup>

<sup>1</sup> Department of Pharmaceutics and Industrial Pharmacy,, College of Pharmacy, Taif University, P.O. Box 11099, Taif 21944, Saudi Arabia

<sup>2</sup> Department of Pharmaceutical Chemistry, College of Pharmacy, Taif University, P.O. Box 11099, Taif 21944, Saudi Arabia; marwa.farg@tu.edu.sa (M.F.A.); i.abdelaal@tu.edu.sa (I.A.N.).

<sup>3</sup> Division of Pharmaceutical Microbiology, Department of Pharmaceutics and Industrial Pharmacy, College of Pharmacy, Taif University, P.O. Box 11099, Taif 21944, Saudi Arabia; shfar@tu.edu

<sup>4</sup> Department of Pharmacy Practice, College of Pharmacy, AlMaarefa University, Ad Diriyah, Riyadh 13713, Saudi Arabia; mghoneim@mcst.edu.sa

<sup>5</sup> UK Dementia Research Institute Cardiff, School of Medicine, Cardiff University, Cardiff CF24 1TP, UK; alsalahati@cardiff.ac.uk

<sup>6</sup> Department of Pharmaceutics, Faculty of Pharmacy, University of Sadat City, P.O. Box 32897, Egypt; hend.abdelbar@fop.usc.edu.eg

\* Correspondence: hadel.a@tu.edu.sa (H.A.A.)

## Supplementary Material

**Table S1.** : Model summary statistics for particle size (Y1) and for EE % (Y2).

| Particle size (Y1)            |               |                |                         |                          |              |                  |
|-------------------------------|---------------|----------------|-------------------------|--------------------------|--------------|------------------|
| Source                        | Std. Dev.     | R <sup>2</sup> | Adjusted R <sup>2</sup> | Predicted R <sup>2</sup> | PRESS        |                  |
| Linear                        | 1.72          | 0.7036         | 0.6580                  | 0.5359                   | 60.42        |                  |
| <b>Quadratic <sup>a</sup></b> | <b>0.3393</b> | <b>0.9912</b>  | <b>0.9867</b>           | <b>0.9746</b>            | <b>3.31</b>  | <b>Suggested</b> |
| Special Cubic                 | 0.3398        | 0.9920         | 0.9867                  | 0.9758                   | 3.15         |                  |
| Cubic                         | 0.3889        | 0.9930         | 0.9826                  | -6.7048                  | 1003.07      |                  |
| Special Quartic               | 0.3609        | 0.9930         | 0.9850                  | 0.9720                   | 3.65         |                  |
| Quartic                       | 0.4187        | 0.9933         | 0.9798                  |                          | *            | Aliased          |
| EE % (Y2)                     |               |                |                         |                          |              |                  |
| Source                        | Std. Dev.     | R <sup>2</sup> | Adjusted R <sup>2</sup> | Predicted R <sup>2</sup> | PRESS        |                  |
| Linear                        | 3.08          | 0.6624         | 0.6105                  | 0.4918                   | 185.58       |                  |
| <b>Quadratic <sup>b</sup></b> | <b>0.8177</b> | <b>0.9817</b>  | <b>0.9725</b>           | <b>0.9489</b>            | <b>18.65</b> | <b>Suggested</b> |
| Special Cubic                 | 0.8607        | 0.9817         | 0.9696                  | 0.9443                   | 20.33        |                  |
| Cubic                         | 0.9593        | 0.9849         | 0.9622                  | -1.7837                  | 1016.51      |                  |
| Special Quartic               | 0.8921        | 0.9847         | 0.9673                  | 0.9424                   | 21.02        |                  |
| Quartic                       | 1.05          | 0.9850         | 0.9549                  |                          | *            | Aliased          |

<sup>a</sup> Adequate precision equals 48.49 and coefficient of variation (C.V.) % is 0.833. <sup>b</sup> Adequate precision equals 32.72 and coefficient of variation (C.V.) % is 1.05.

**Table S2.** Quantitative factor effects on the A: particle size (Y1) and B: EE % (Y2) expressed as the coefficients of the regression equations.

| <b>A: particle size (Y1)</b> |                                   |           |                       |                   |                        |            |
|------------------------------|-----------------------------------|-----------|-----------------------|-------------------|------------------------|------------|
| <b>Component</b>             | <b>Coefficient Es-<br/>timate</b> | <b>df</b> | <b>Standard Error</b> | <b>95% CI Low</b> | <b>95% CI<br/>High</b> | <b>VIF</b> |
| A-P123                       | 49.91                             | 1         | 0.7266                | 48.29             | 51.53                  | 16.59      |
| B-P407                       | 42.96                             | 1         | 0.7064                | 41.39             | 44.53                  | 14.11      |
| C-TPGS                       | 88.44                             | 1         | 5.02                  | 77.26             | 99.61                  | 192.69     |
| AB                           | -30.24                            | 1         | 2.42                  | -35.63            | -24.85                 | 17.19      |
| AC                           | -68.56                            | 1         | 7.48                  | -85.24            | -51.89                 | 81.61      |
| BC                           | -80.96                            | 1         | 7.29                  | -97.20            | -64.72                 | 74.25      |
| <b>B: EE % (Y2).</b>         |                                   |           |                       |                   |                        |            |
| <b>Component</b>             | <b>Coefficient Es-<br/>timate</b> | <b>df</b> | <b>Standard Error</b> | <b>95% CI Low</b> | <b>95% CI<br/>High</b> | <b>VIF</b> |
| A-P123                       | 105.52                            | 1         | 1.75                  | 101.62            | 109.42                 | 16.59      |
| B-P407                       | 93.43                             | 1         | 1.70                  | 89.64             | 97.22                  | 14.11      |
| C-TPGS                       | -5.04                             | 1         | 12.09                 | -31.97            | 21.89                  | 192.69     |
| AB                           | -74.19                            | 1         | 5.83                  | -87.17            | -61.21                 | 17.19      |
| AC                           | 42.05                             | 1         | 18.03                 | 1.87              | 82.23                  | 81.61      |
| BC                           | 67.93                             | 1         | 17.56                 | 28.80             | 107.06                 | 74.25      |

**Table S3.** ANOVA of the obtained data from D-Optimal design for the particle size (Y1) and EE % (Y2) of olanzapine polymeric micelles and associated p-values.

| <i>A: particle size (Y1)</i> | Source                      | Sum of Squares | df | Mean Square | F-value | p-value  |                 |
|------------------------------|-----------------------------|----------------|----|-------------|---------|----------|-----------------|
|                              | <b>Model</b>                | 129.04         | 5  | 25.81       | 224.15  | < 0.0001 | significant     |
|                              | <sup>①</sup> Linear Mixture | 91.60          | 2  | 45.80       | 397.81  | < 0.0001 |                 |
|                              | AB                          | 18.02          | 1  | 18.02       | 156.48  | < 0.0001 |                 |
|                              | AC                          | 9.67           | 1  | 9.67        | 83.96   | < 0.0001 |                 |
|                              | BC                          | 14.21          | 1  | 14.21       | 123.41  | < 0.0001 |                 |
|                              | <b>Residual</b>             | 1.15           | 10 | 0.1151      |         |          |                 |
|                              | Lack of Fit                 | 0.2750         | 5  | 0.0550      | 0.3137  | 0.8855   | not significant |
|                              | Pure Error                  | 0.8764         | 5  | 0.1753      |         |          |                 |
|                              | <b>Cor Total</b>            | 130.19         | 15 |             |         |          |                 |
| <i>B: EE % (Y2)</i>          | Source                      | Sum of Squares | df | Mean Square | F-value | p-value  |                 |
|                              | <b>Model</b>                | 358.49         | 5  | 71.70       | 107.23  | < 0.0001 | significant     |
|                              | <sup>①</sup> Linear Mixture | 241.90         | 2  | 120.95      | 180.89  | < 0.0001 |                 |
|                              | AB                          | 108.44         | 1  | 108.44      | 162.17  | < 0.0001 |                 |
|                              | AC                          | 3.64           | 1  | 3.64        | 5.44    | 0.0419   |                 |
|                              | BC                          | 10.00          | 1  | 10.00       | 14.96   | 0.0031   |                 |
|                              | <b>Residual</b>             | 6.69           | 10 | 0.6686      |         |          |                 |
|                              | Lack of Fit                 | 1.20           | 5  | 0.2391      | 0.2178  | 0.9401   | not significant |
|                              | Pure Error                  | 5.49           | 5  | 1.10        |         |          |                 |
|                              | <b>Cor Total</b>            | 365.17         | 15 |             |         |          |                 |
